# Supplementary material for: Multi-compositional hierarchical nanostructured Ni3S2@MoSx/NiO electrodes for enhanced electrocatalytic hydrogen generation and energy storage
Source: Royal Society of Chemistry journal article supplement (doi:10.1039/c8ta06023a), 2018-01-01
Supplement: c8ta06023a1.pdf [file c8ta06023a1.pdf]

## Supporting Information

### **Multi-compositional hierarchical nanostructured Ni<sub>3</sub>S<sub>2</sub>@MoS<sub>x</sub>/NiO electrode for enhanced electrocatalytic hydrogen generation and energy storage**

Kane Jian Hong Lim<sup>a,b</sup>, Gamze Yilmaz<sup>a</sup>, Yee-Fun Lim<sup>c</sup> and Ghim Wei Ho<sup>a,c,d,\*</sup>

a. Department of Electrical and Computer Engineering, National University of Singapore, 4 Engineering Drive 3, 117583, Singapore

b. NUS Graduate School for Integrative Sciences and Engineering, National University of Singapore, 28 Medical Drive, 117456, Singapore

c. Institute of Materials Research and Engineering, A\*STAR (Agency for Science, Technology and Research), 3 Research Link, 117602, Singapore

d. Engineering Science Programme, National University of Singapore, 9 Engineering Drive 1, 117575, Singapore

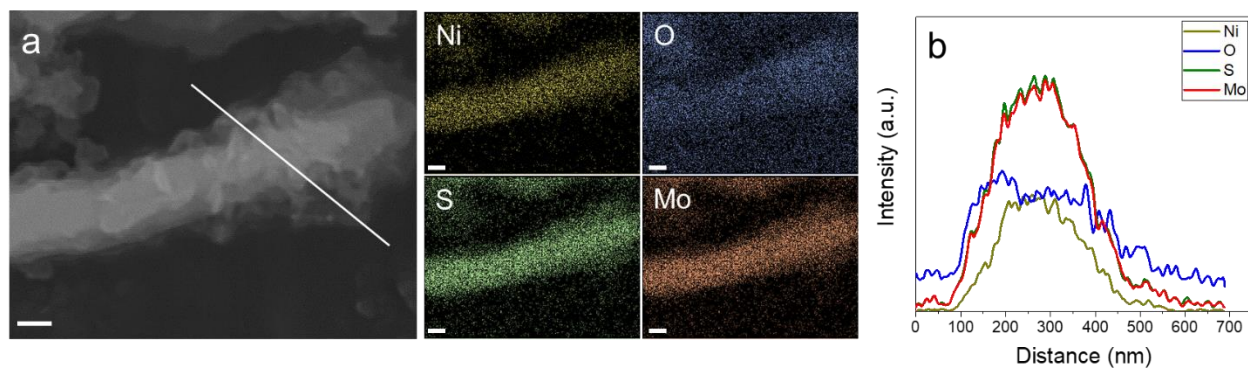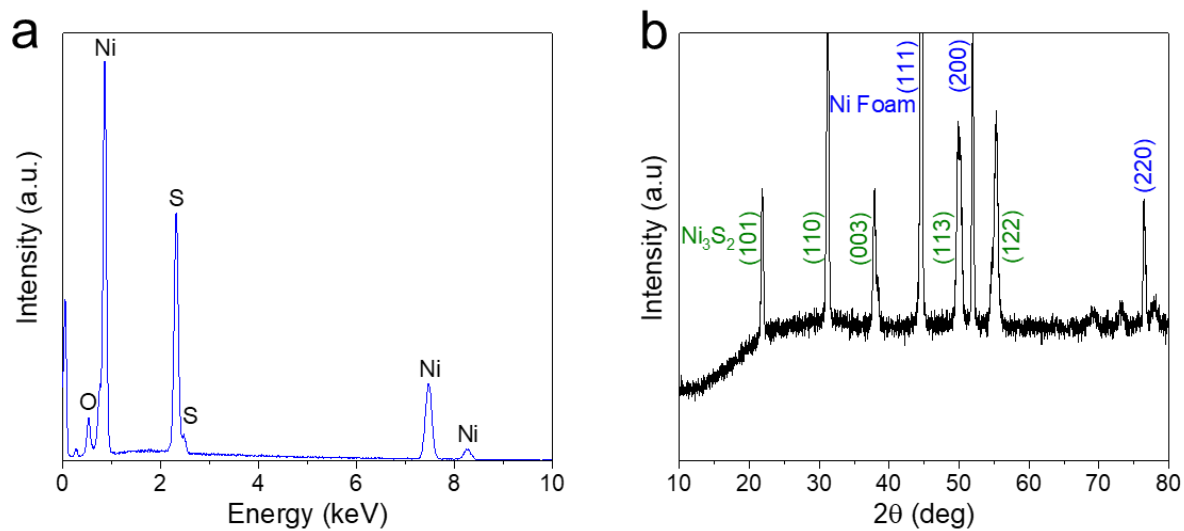

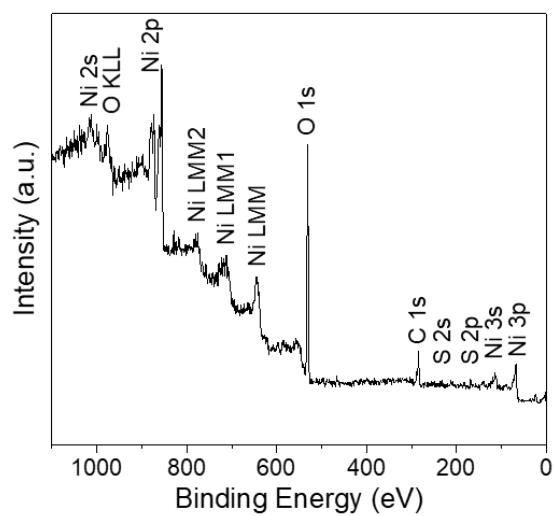

Figure S3. (a) XPS survey scan of NS-rods

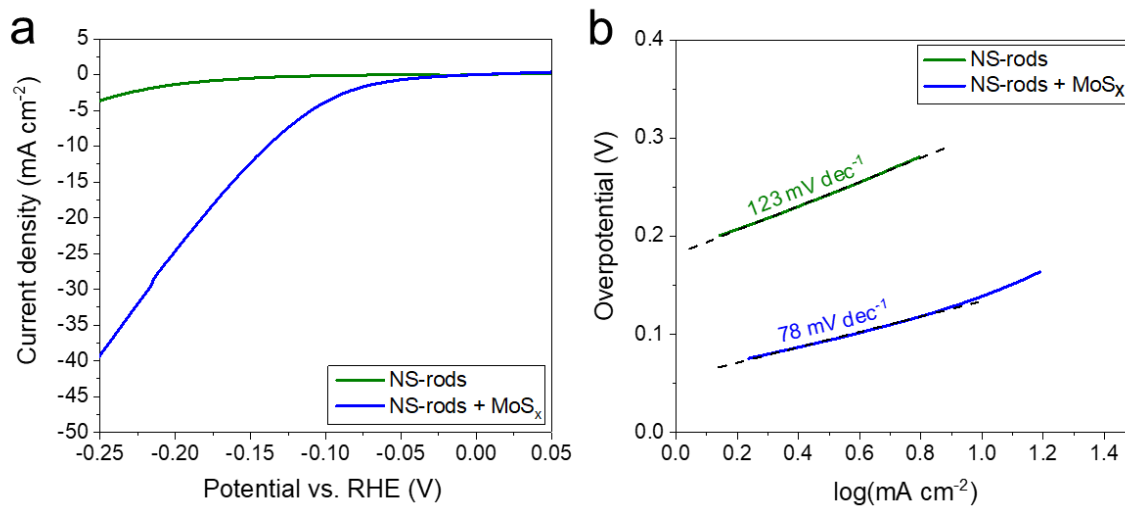

Figure S4. (a) Polarization curves at scan rate  $5 \text{ mVs}^{-1}$  and (b) corresponding Tafel plot of NS-rods and NS-rods coated with  $\text{MoS}_x$

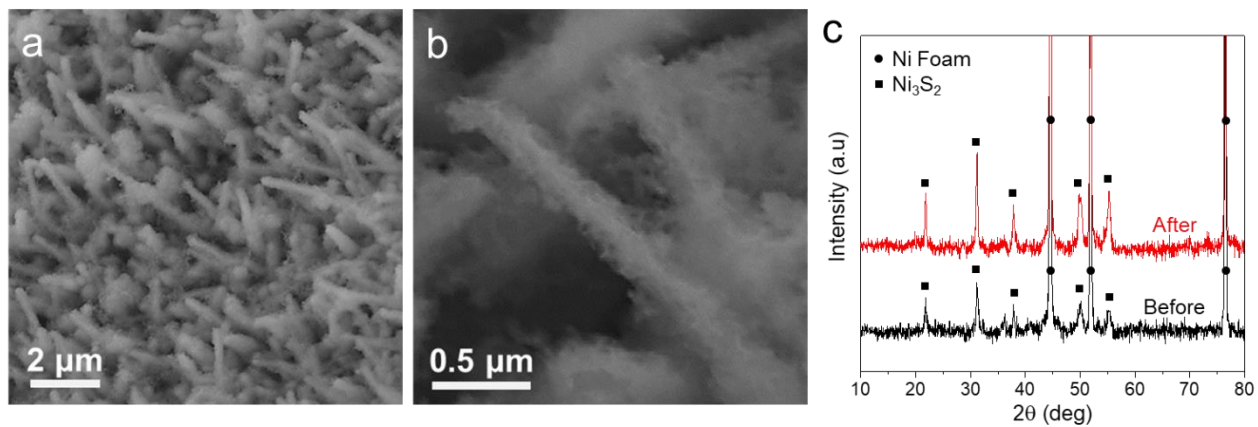

Fig. S5 (a-b) SEM images at different magnification of NM-rods after 50 h of HER stability test. (c) XRD spectra of NM-rods before and after stability test.
